# Supplementary material for: Nationwide aerial laser scanning reveals relict rock glaciers and protalus ramparts in Slovenia
Source: Copernicus journal article supplement (doi:10.5194/tc-2016-86), 2016-06-13
Supplement: Supplementary file 1 [file tc-2016-86-supplement.pdf]

## Supplement

### S1 Potential rock glaciers

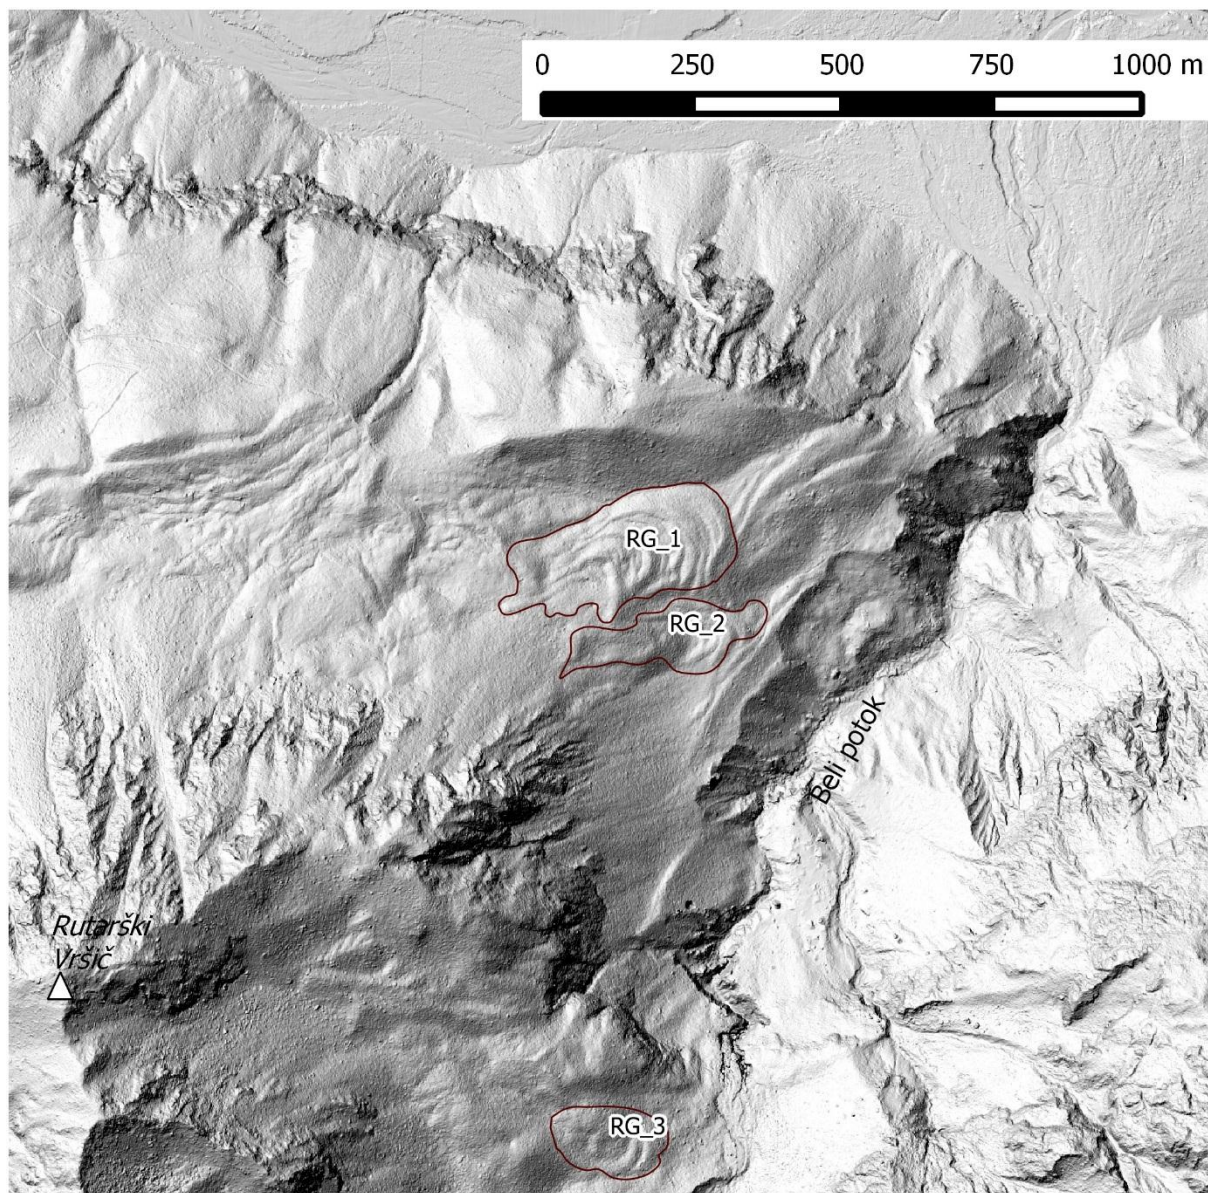

5 **Figure S1.** Rock glaciers no. RG\_1, RG\_2, RG\_3.



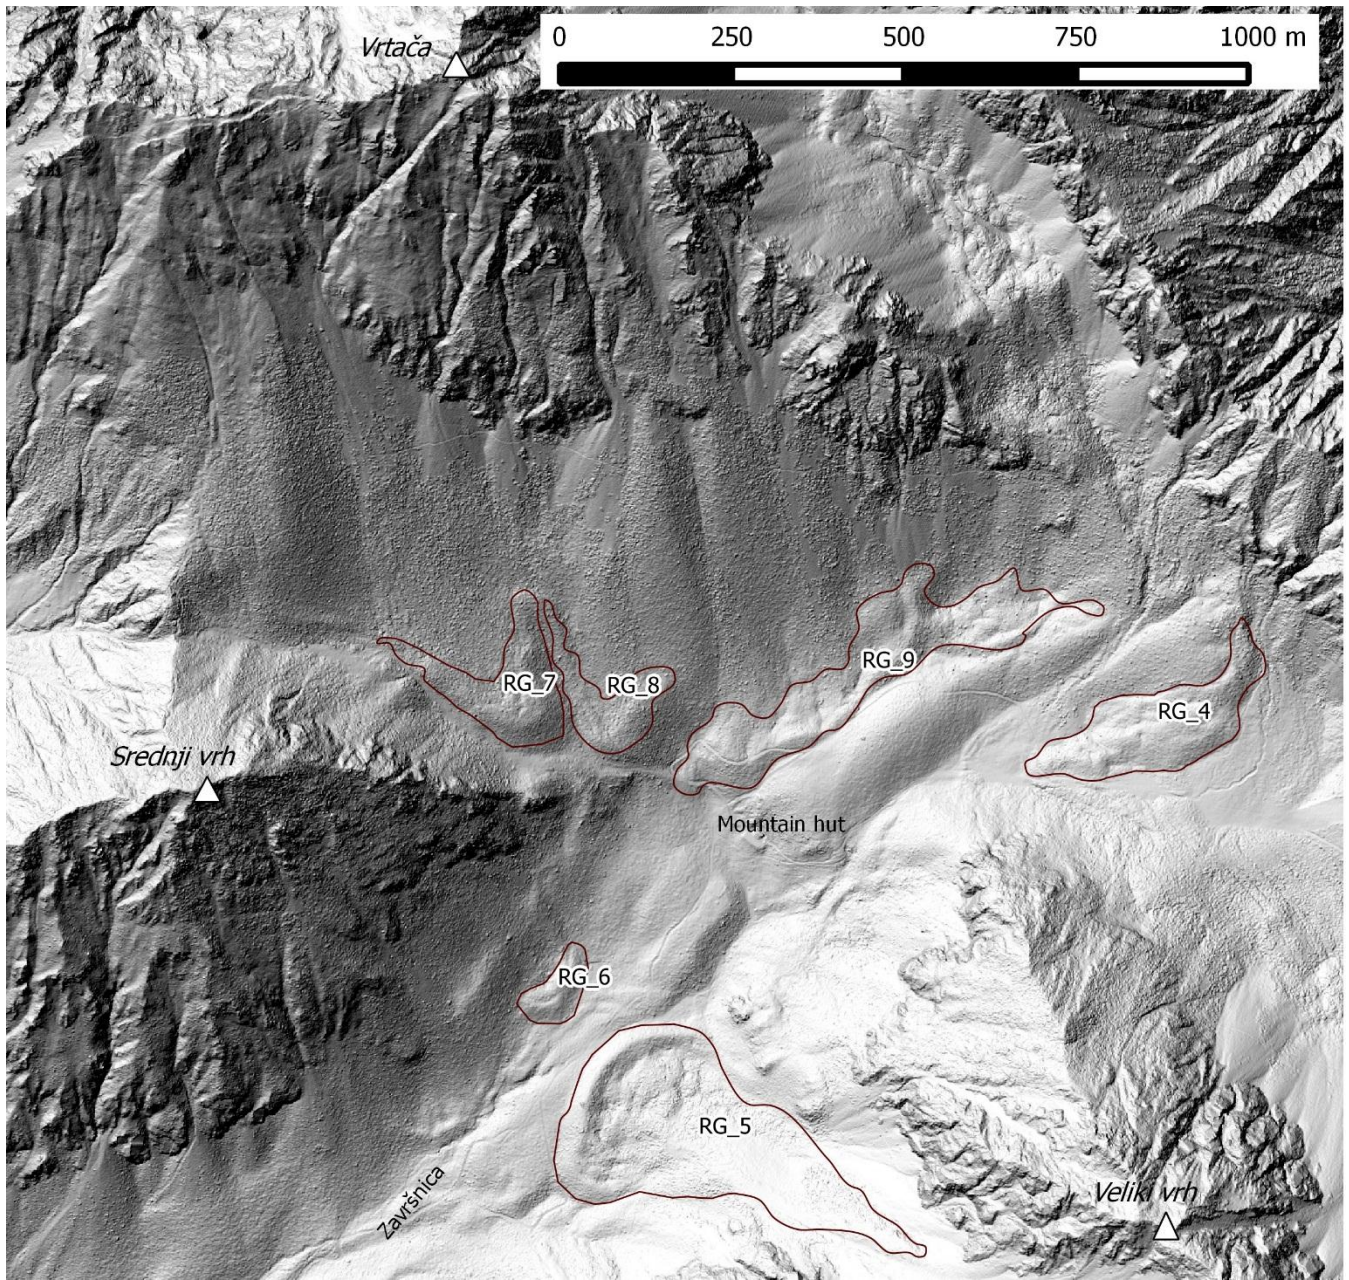

Figure S2. Rock glacier no. RG\_4, RG\_5, RG\_6, RG\_7, RG\_8, RG\_9.



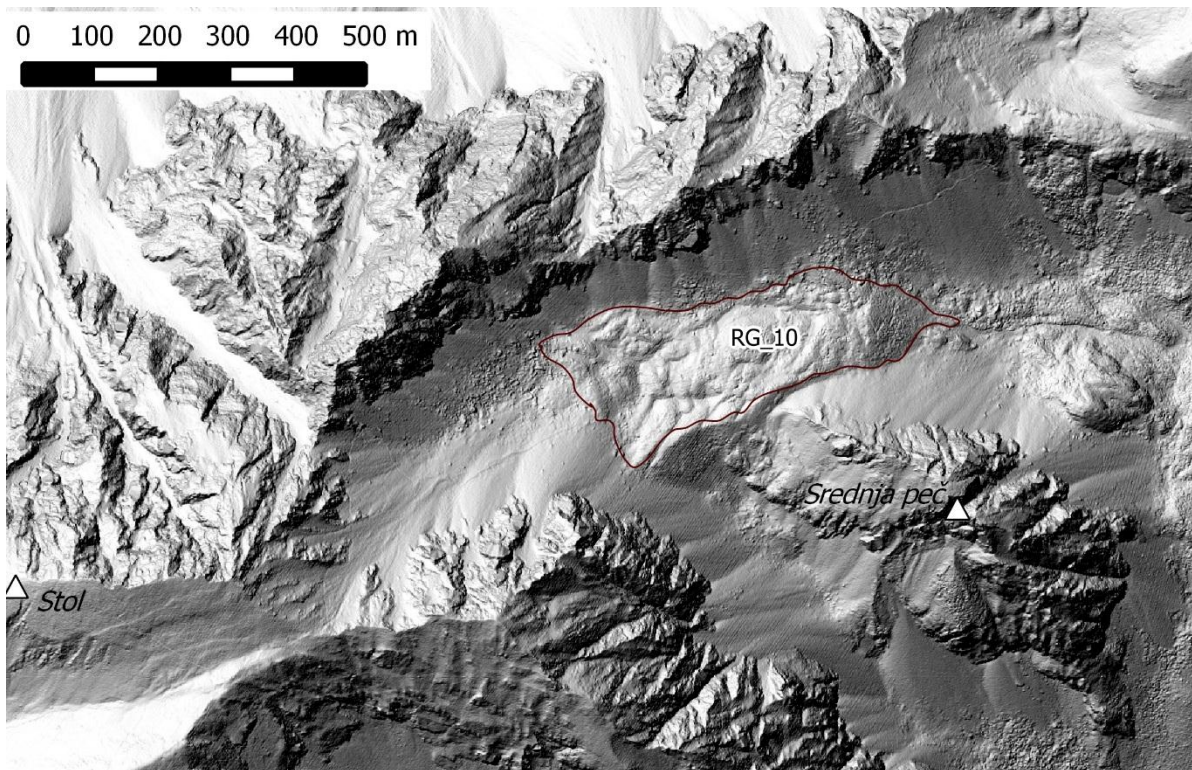

**Figure S3.** Rock glacier no. RG\_10.

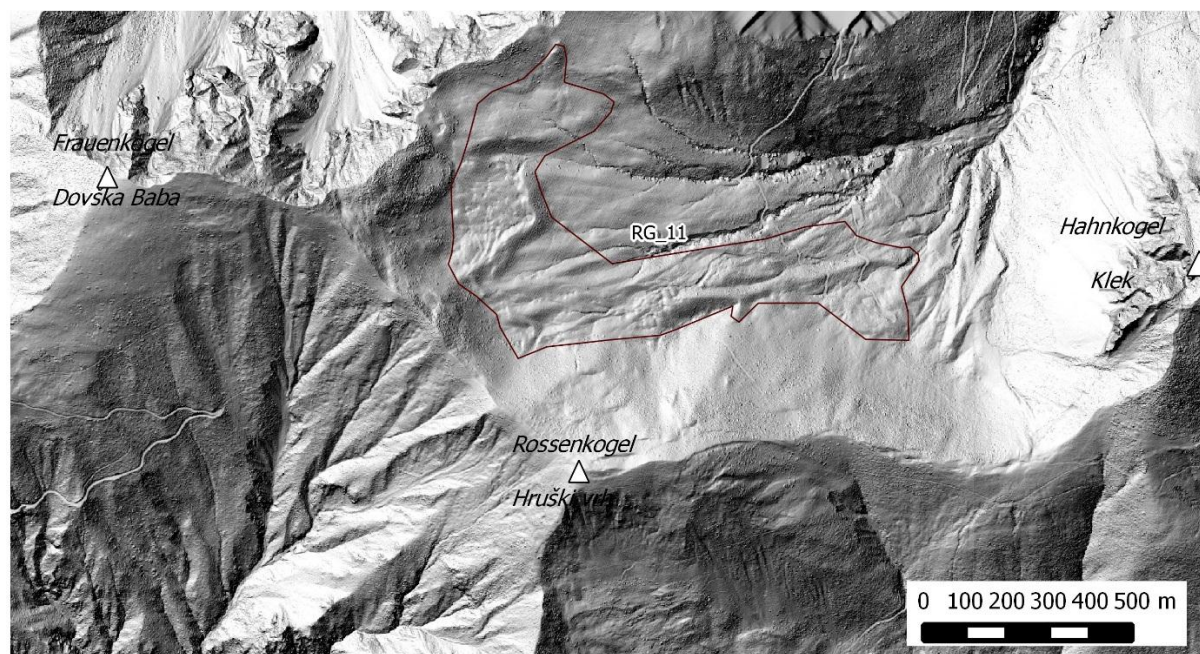

**Figure S4.** Rock glacier no. RG\_11.



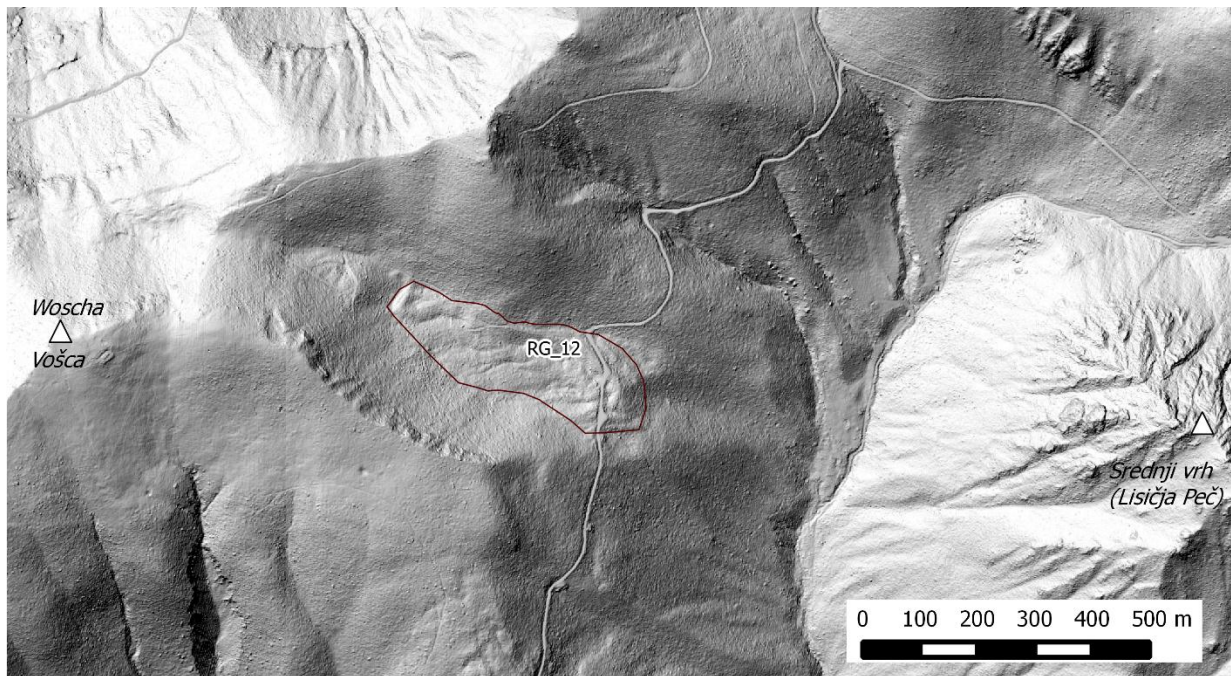

**Figure S5.** Rock glacier no. RG\_12.

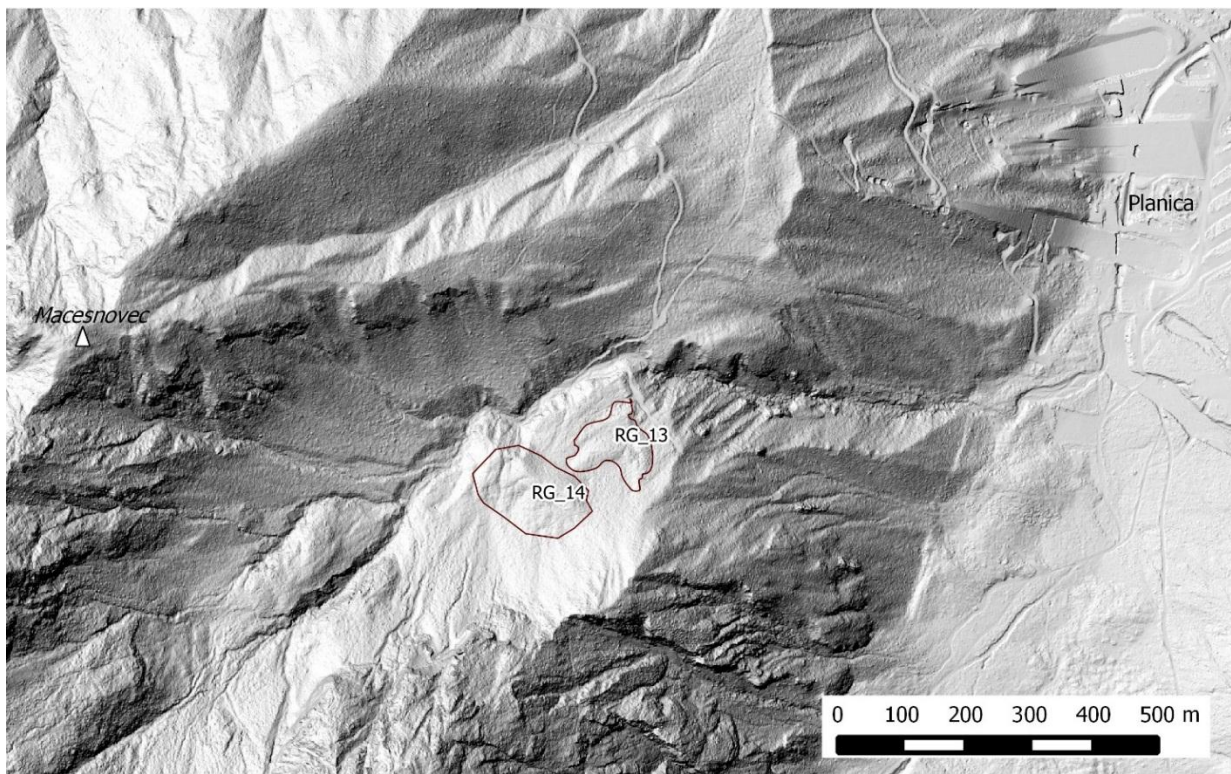

**Figure S6.** Rock glacier no. RG\_13 and RG\_14.



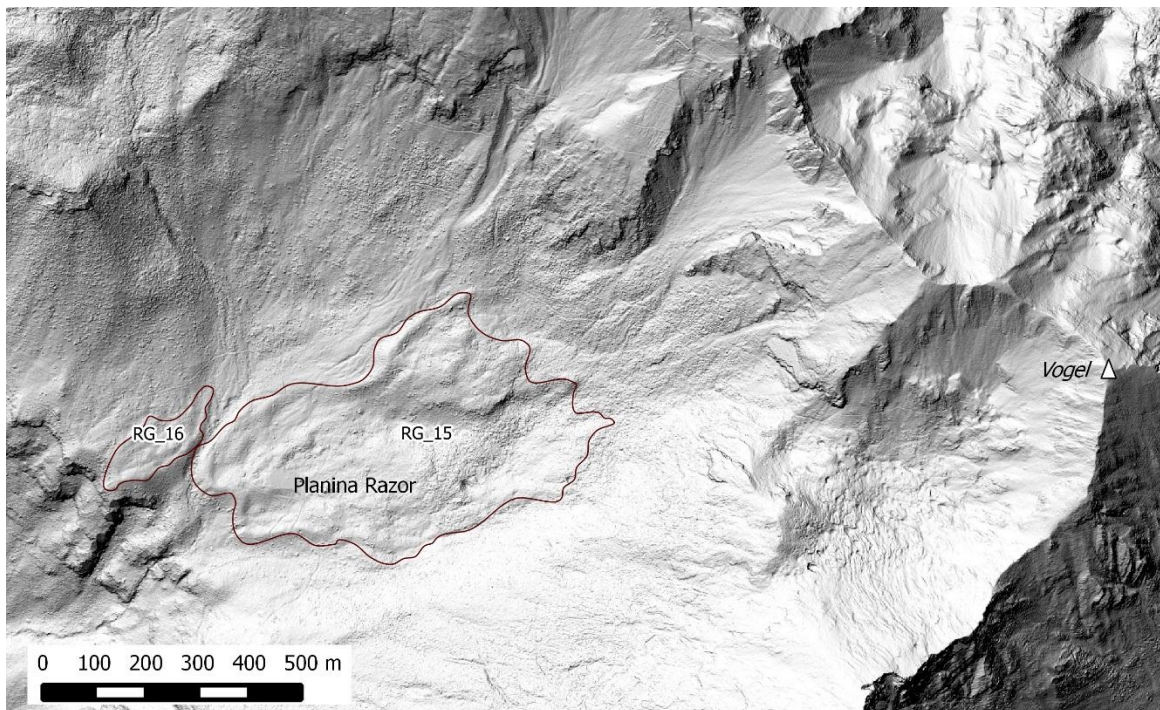

**Figure S7.** Rock glacier no. RG\_15 and RG\_16.

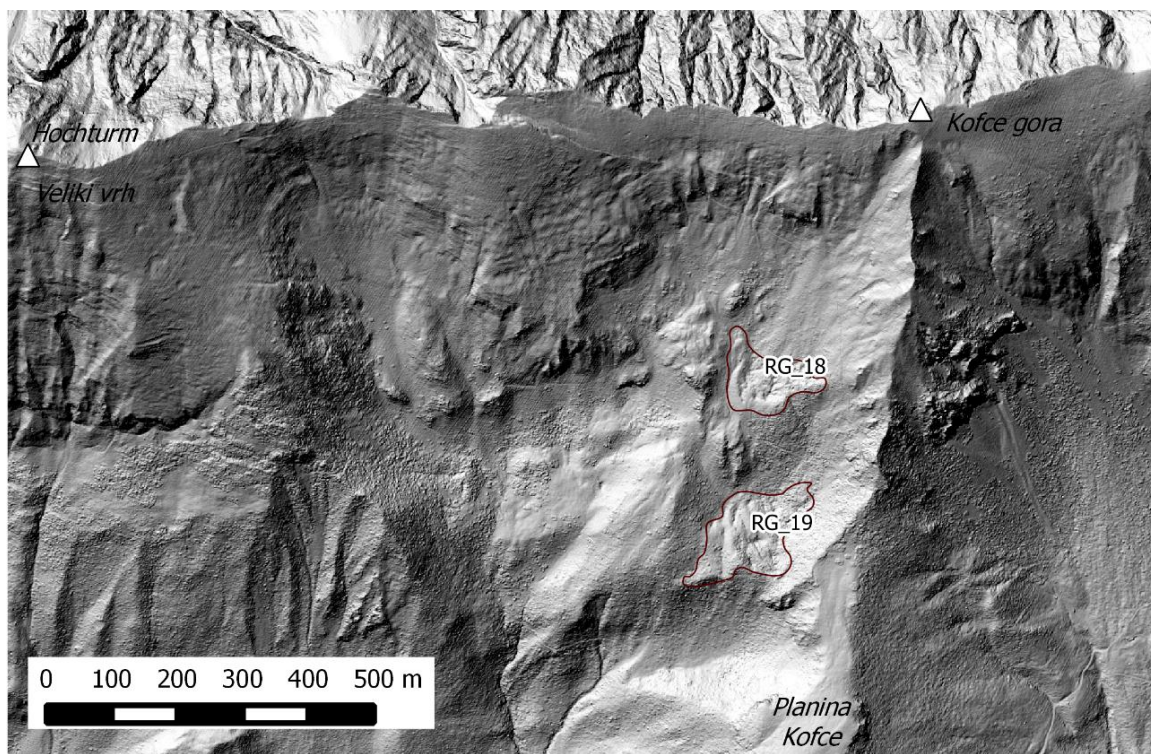

**Figure S8.** Rock glacier no. RG\_18 and RG\_19.



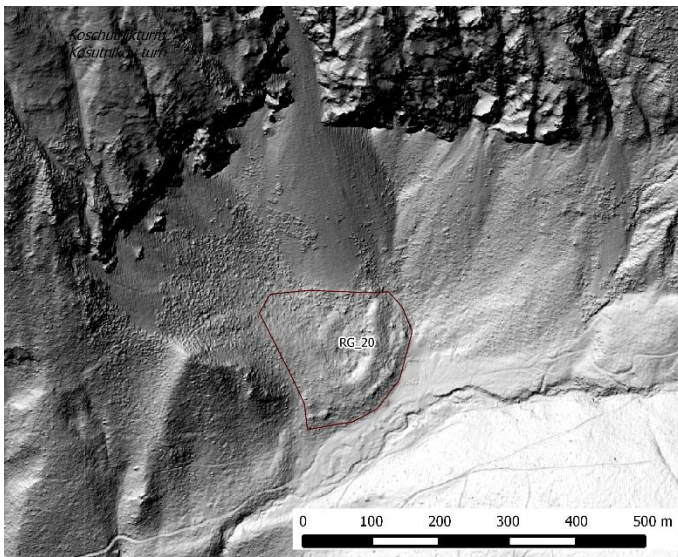

**Figure S9.** Rock glacier no. RG\_20.

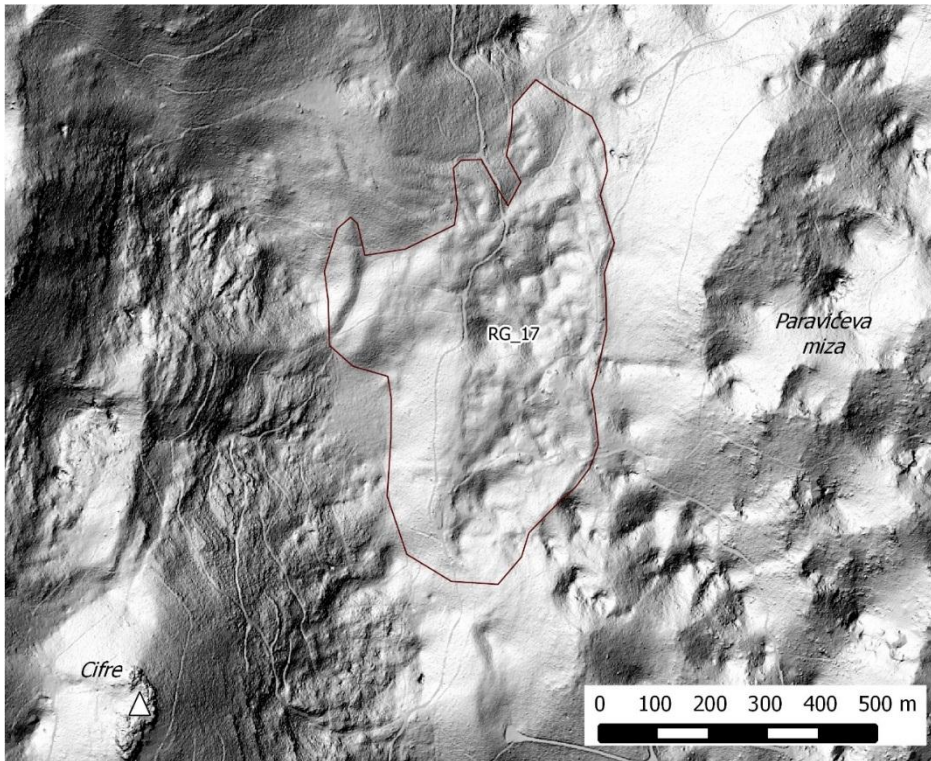

**Figure S10.** Rock glacier no. RG\_17.

## S2 Potential rotalus ramparts

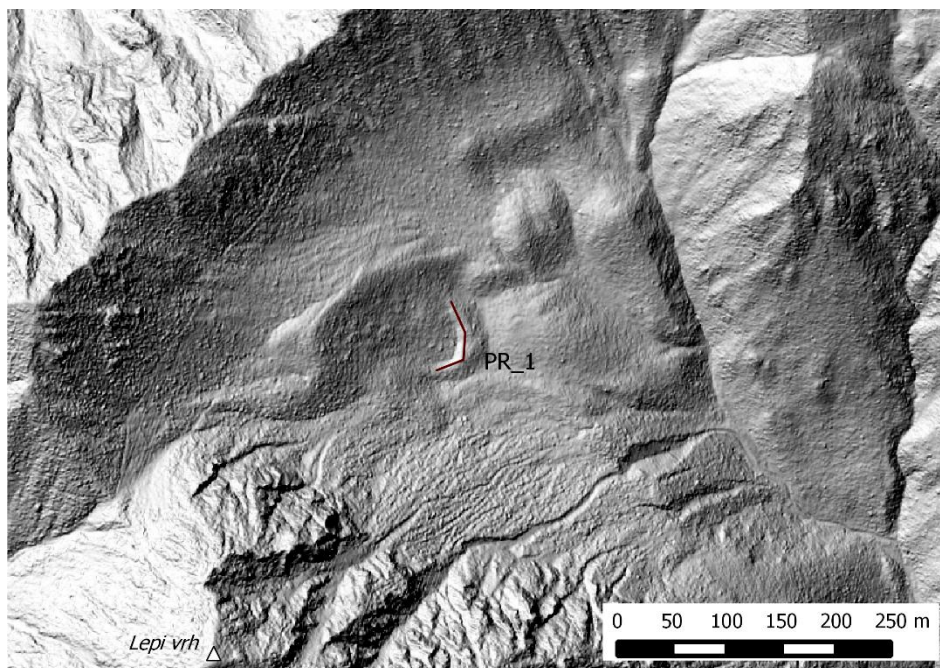

**Figure S11.** Protalus rampart no. PR\_1.

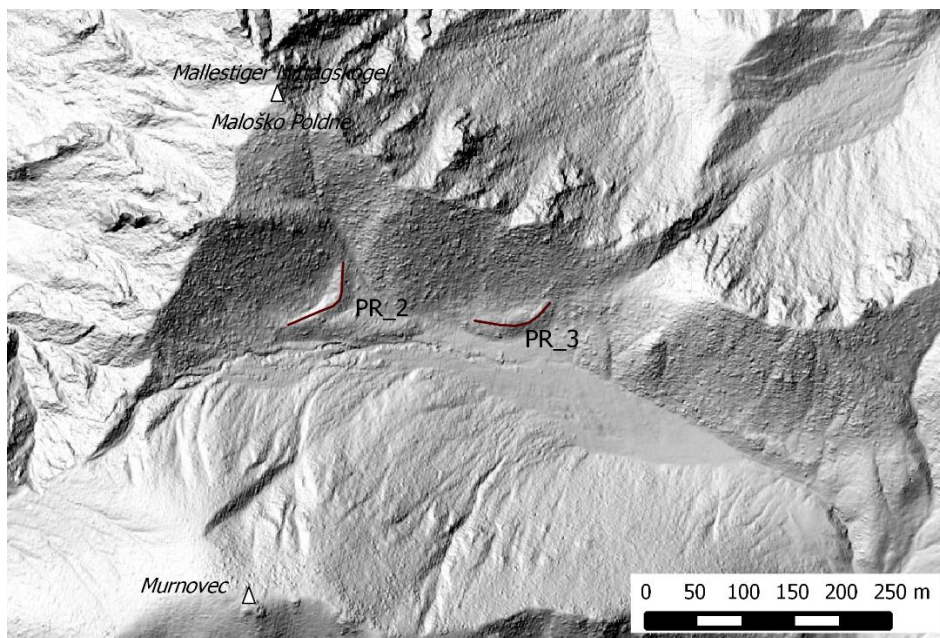

5 **Figure S12.** Protalus rampart no. PR\_2 and PR\_3.



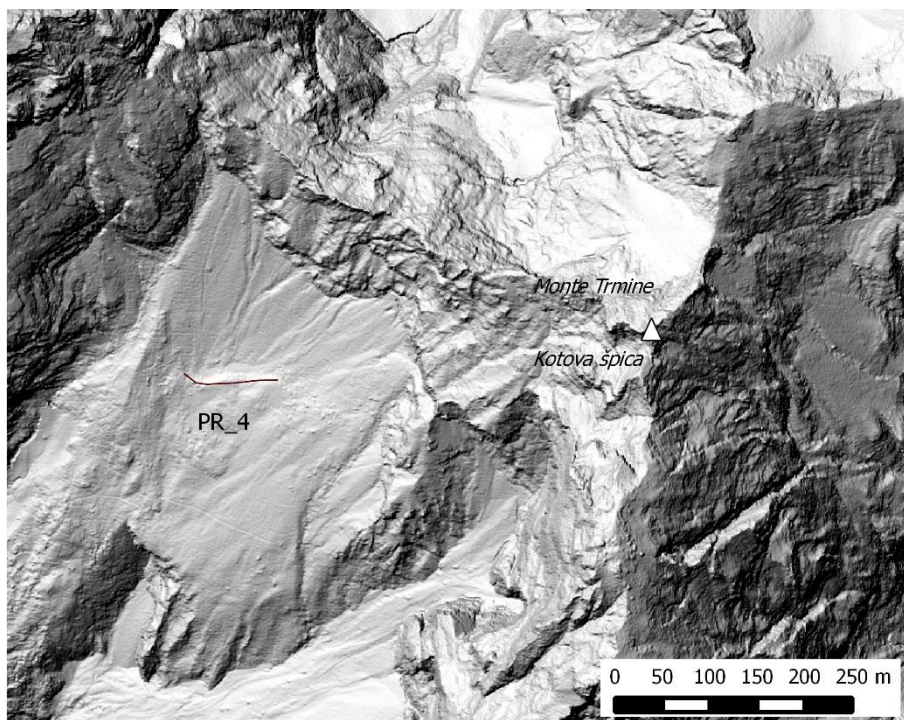

**Figure S13.** Protalus rampart no. PR\_4.

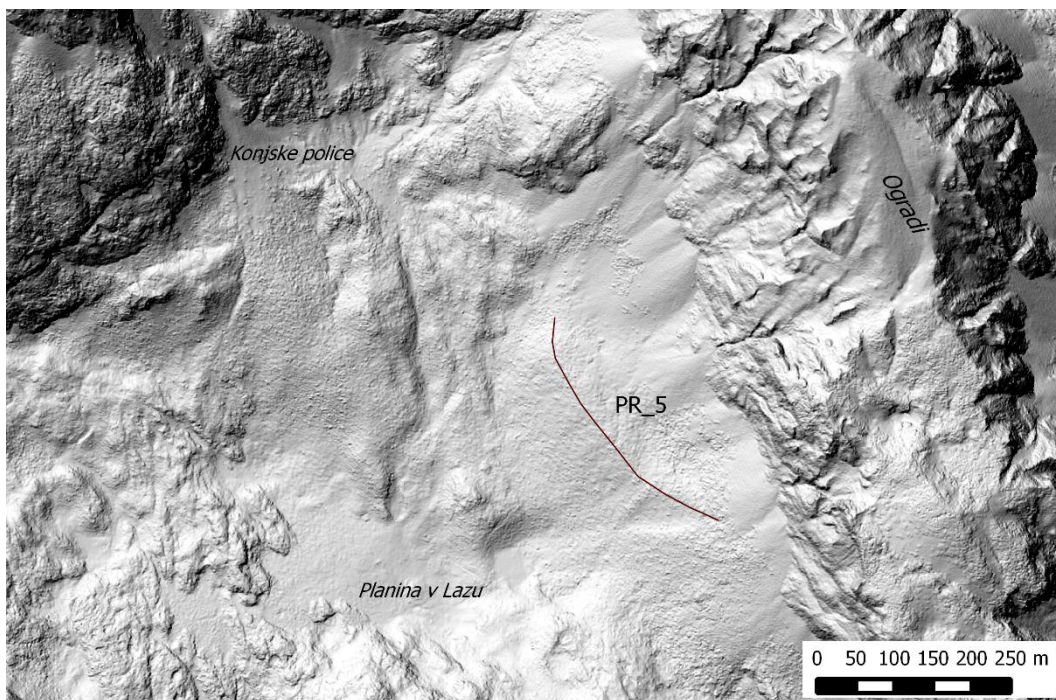

**Figure S14.** Protalus rampart no. PR\_5.



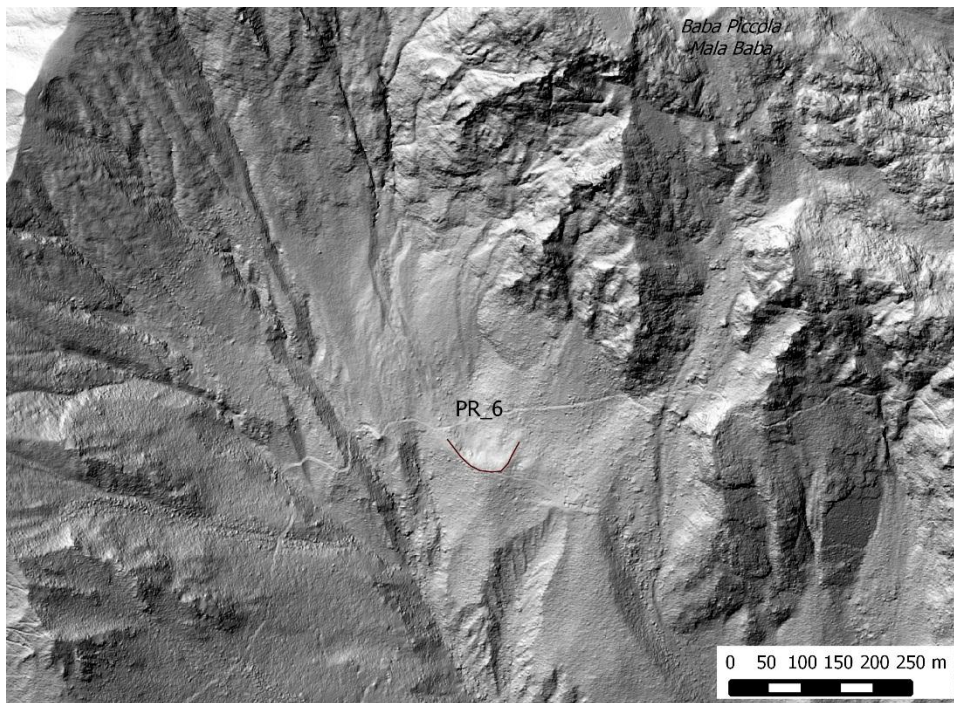

**Figure S15.** Protalus rampart no. PR\_6.

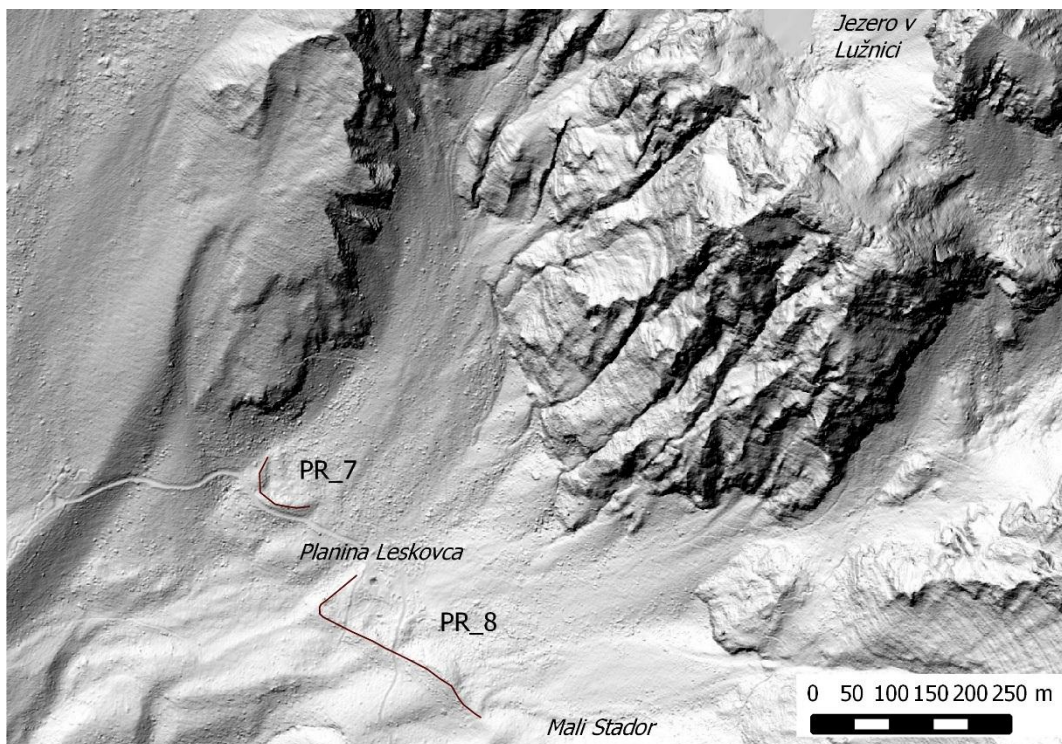

**Figure S16.** Protalus rampart no. PR\_7 and PR\_8.
